# Supplementary material
Source: PubMed Central journal article supplement (PMC4204673)
Supplement: supp_mcu146_mcu146supp.pdf [file supp_mcu146_mcu146supp.pdf]

SUPPLEMENTARY DATA

Figure S1. Phylogenetic hypothesis of the *rbcL* locus of *Trebouxia* species: 50% majority rule consensus tree of the Bayesian analysis; branch supports (Bayesian PP>95% / ML bootstrap values >70%) are reported over or beside the branches; branches and DNA extraction numbers of our new *Trebouxia* sequences (see Table S1) are highlighted in bold; sequences retrieved from GenBank are reported with their accession numbers.

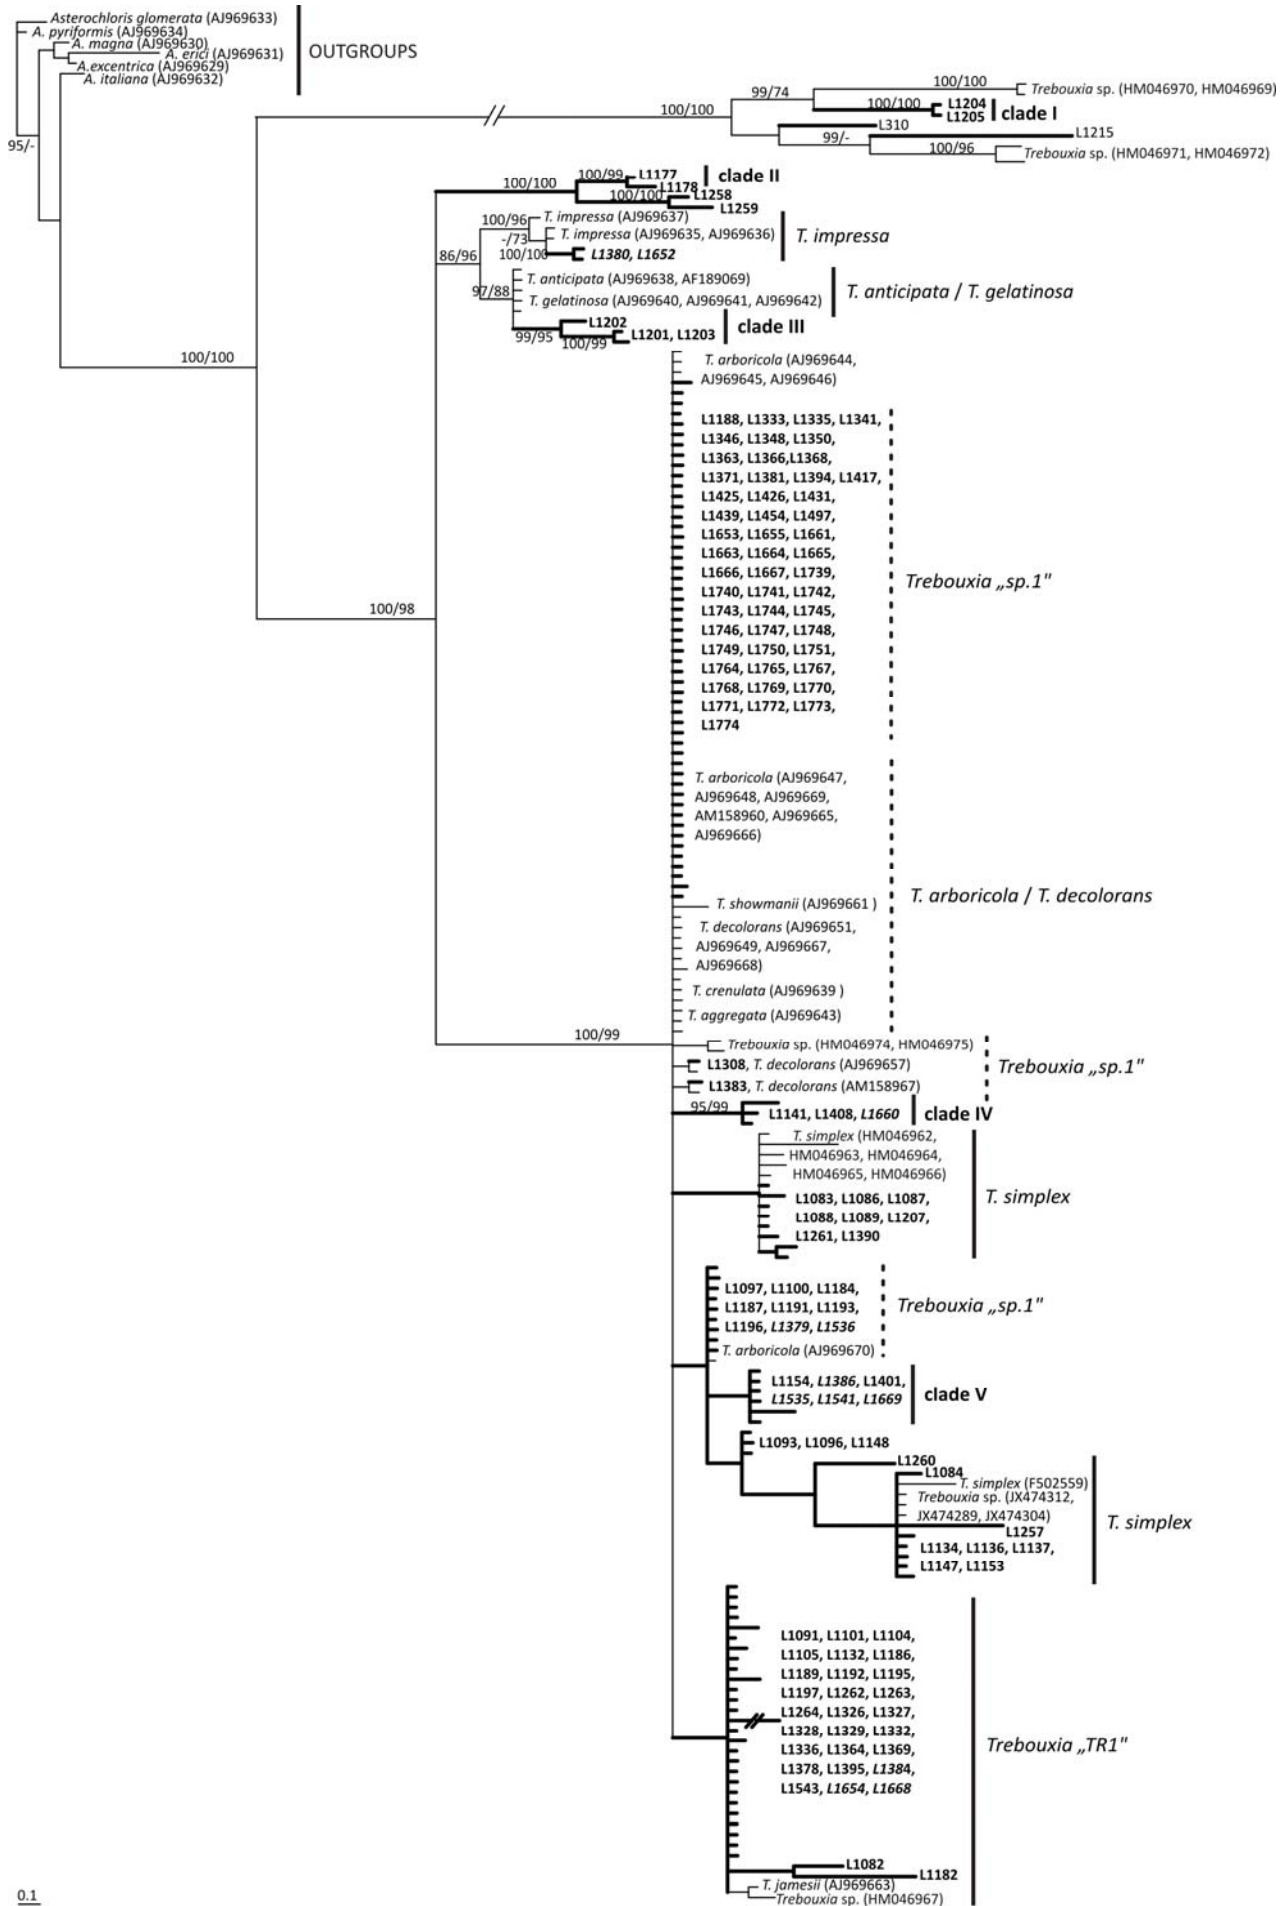

**Supplementary information: Table S1**

**Table S1.** Information about all the *Tephromela* spp. samples for which *Trebouxia* photobionts have been studied. Assignment to the phylogenetic clades as in Figure 1, DNA extraction numbers, geographic origin, lichen species, voucher information and growth substrate are reported. All NCBI accessions for the ITS and *rbcL* algal loci are here newly published. Sequence data corresponding to cultured photobiont are in italics. Dashes indicate lack data.

**Table S1.** Information about all the *Tephromela* spp. samples for which *Trebouxia* photobionts have been studied. Assignment to the phylogenetic clades as in Figure 1, DNA extraction numbers, geographic origin, lichen species, voucher information and growth substrate are reported. All NCBI accessions for the ITS and rbcL algal loci are here newly published. Sequence data corresponding to cultured photobiont are in italics. Dashes indicate lack data.

| Phylogenetic clade (ITSp) | DNA extr. N.  | Origin of specimens, year of collection                                                        | <i>Tephromela</i> species | collector and number (herbarium) | substrate | ITSp     | rbcL     |
|---------------------------|---------------|------------------------------------------------------------------------------------------------|---------------------------|----------------------------------|-----------|----------|----------|
|                           | <b>Africa</b> |                                                                                                |                           |                                  |           |          |          |
| clade I                   | L1764         | Kenya, Taita Taveta District, Mbololo Forest Peak, 3°19' S/ 38°27' E, ca. 2000 m a.s.l., 2012. | <i>T. atra</i> s.lat.     | Krika P. 2234 (NMK)              | bark      | KJ754201 | KM091781 |
| -                         | L1765         | Kenya, Kirinyaga District, Mt. Kenya, Bantu Lodge, 0°07' S/ 37°03' E, 1960 m a.s.l., 2012.     | "                         | Krika P. 1140                    | bark      | -        | KM091782 |
| -                         | L1767         | Kenya, Taita Taveta District, Mbololo Hill, 3°19' S/ 38°27' E, 1766-2091 m a.s.l., 2012.       | "                         | Krika P. 2234                    | bark      | -        | KM091783 |
| clade I                   |               | <i>L1767 culture: L1831</i>                                                                    |                           |                                  |           | KJ754202 | -        |
|                           | <b>Asia</b>   |                                                                                                |                           |                                  |           |          |          |
| -                         | L1745         | Japan, Sichuan Prov., Dege Co., Queershan Mt., 31°55'110" N/ 98°56'62" E, 4510 m a.s.l., 2007. | <i>T. atra</i> s.lat.     | Wang Li-song 07-28239            | rock      | -        | KM091774 |
| -                         | L1746         | Japan, Yunnan Prov., Lijiang Co., Laojunshan Mt., 26°37.878' N/ 99°                            | "                         | Wang Li-song 07-27718            | rock      | -        | KM091775 |

|          |                  |                                                                                                                  |   |                          |                                   |          |          |
|----------|------------------|------------------------------------------------------------------------------------------------------------------|---|--------------------------|-----------------------------------|----------|----------|
|          |                  | 43,491'E, 4050 m a.s.l., 2007.                                                                                   |   |                          |                                   |          |          |
| -        | L1748            | Japan, Yunnan Prov., Dongchuan Co., Luoxue Village, 26°09'469" N/ 102°55'662"E, 4020 m a.s.l., 2009.             | " | Wang Li-song<br>09-30572 | rock                              | -        | KM091777 |
| -        | L1749            | Japan, Sichuan Prov., Kangding Co., Yajiagen 29°47'940" N/ 102°03'704" E, 3962 m a.s.l., 2010.                   | " | Wang Li-song<br>10-31875 | rock                              | -        | KM091778 |
| -        | L1747            | Tibet, Basu Co. Ranwn village, 29°29'826"N / 96°42'040" E, 3920 m a.s.l., 2007.                                  | " | Wang Li-song<br>07-28107 | bark                              | -        | KM091776 |
| -        | L1257            | Russia, Primorskiy Kray, Sikhote-Alin' Mountains, 44°01.340'N/ 134°13.024'E, 2007.                               | " | Spribille 23341<br>(GZU) | bark ( <i>Abies nephrolepis</i> ) | -        | KJ754363 |
| -        | L1258            | Russia, Primorskiy Kray, Sikhote-Alin' Mountains, Sikhote-Alin'skiy Zapovednik, 45°07.743'N/ 135°52.309'E, 2007. | " | Spribille 23903<br>(GZU) | bark ( <i>Abies nephrolepis</i> ) | -        | KJ754339 |
| clade IV | L1141<br>(TS850) | Russia, Tsarskaya Dorogo, above Staraya Medvezhka, 52° 09.604' N/ 134°19.697'E, 910 m a.s.l., 2009.              | " | Spribille 31797          | rock                              | KJ754245 | KJ754346 |
| clade IV | L1739            | Russia, 2011.                                                                                                    | " | Yakovchenko<br>T127      | rocks                             | KJ754246 | KM091768 |
| clade I  | L1740            | Russia, 2011.                                                                                                    | " | Yakovchenko<br>T118      | rocks                             | KJ754200 | KM091769 |
| -        | L1741            | Russia, 2011.                                                                                                    | " | Yakovchenko              | rocks                             | -        | KM091770 |

|                           |                         |                                                                                                                        |                          |                                               |                                              |          |          |
|---------------------------|-------------------------|------------------------------------------------------------------------------------------------------------------------|--------------------------|-----------------------------------------------|----------------------------------------------|----------|----------|
|                           | <b>Nord<br/>America</b> |                                                                                                                        |                          |                                               |                                              |          |          |
| <i>T. simplex/jamesii</i> | L1134                   | U.S.A., Oregon, Linn County, Horse Rock Ridge research Natural Area, 44.29° N/ 122.87° W, 766 m a.s.l., 2009.          | <i>Tephromela</i><br>sp. | McCune 30446                                  | bark<br>( <i>Arctostaphylos columbiana</i> ) | KJ754219 | KJ754357 |
| <i>T. simplex/jamesii</i> | L1136                   | U.S.A., Oregon, Linn County, Horse Rock Ridge Research Area, 44.2980° N/ 122.8743° W, 766 m a.s.l., 2009.              | "                        | McCune 30446<br>(duplicate)                   | bark<br>( <i>Arctostaphylos columbiana</i> ) | KJ754220 | KJ754358 |
| -                         | L1137                   | Canada, British Columbia, 2009.                                                                                        | "                        | Björk 18421                                   | bark                                         | -        | KJ754359 |
| <i>T. simplex/jamesii</i> | L1138                   | Canada, British Columbia, Fraser Canyon, Sailor bar Tunnel, 49°38.5' N/ 121°24.6' W, 2009.                             | "                        | Björk 18507                                   | bark                                         | KJ754221 | -        |
| <i>Trebouxia</i> "sp.1"   | L1394                   | U.S.A., Mexico, Baja California, Guadalupe Island, 29°00'30" N/ 118°15'20" W, 750 m a.s.l., 1996.                      | <i>T. nashii</i>         | Nash 38500<br>(MSC0074768)                    | basaltic rock                                | KJ754311 | KM091752 |
| clade IV                  | L1389                   | U.S.A., Alaska, Kruzof Island-Liesnoi Island, 57°00.731' N/ 135°41.515' W, 1 m a.s.l., 2010.                           | <i>T. atra</i> s.lat.    | Spribille<br>WP825                            | basaltic rock                                | KJ754242 | -        |
| clade V                   |                         | <i>L1389 culture: L1541 (and L1656)</i>                                                                                |                          |                                               |                                              | KJ754248 | KJ754352 |
| clade IV                  | L1408                   | U.S.A., Alaska, Central Interior, White Mountains, Twelvemile Summit, 65.399694° N/ 145.983796° W, 995 m a.s.l., 2011. | <i>T. atra</i> s.lat.    | Spribille &<br>Fernández-<br>Mendoza<br>(GZU) | siliceous rock                               | KJ754241 | KJ754347 |
| <i>Trebouxia</i> "TR1"    |                         | <i>L1408 culture: L1660</i>                                                                                            |                          |                                               |                                              | KJ754297 | KJ754348 |

|                         |                      |                                                                                                                         |                       |                           |                                 |          |          |
|-------------------------|----------------------|-------------------------------------------------------------------------------------------------------------------------|-----------------------|---------------------------|---------------------------------|----------|----------|
| clade IV                | L1871                | U.S.A., Alaska, Glacier Bay National Park and Preserve, Excursion Ridge, 58.46168° N/ 135.55652° W, 895 m a.s.l., 2012. | <i>T. atra</i> s.lat. | Spribille 38350 (B)       | soft argillite                  | KJ754244 | -        |
|                         | <b>South America</b> |                                                                                                                         |                       |                           |                                 |          |          |
| -                       | L1147                | Argentina, Prov. De Rio Negro, S.C. de Bariloche, 41°07'04" S/ 71°27'29" O, 817 m a.s.l., 2010.                         | <i>Tephromela</i> sp. | Messuti M.I. (BCRU 05151) | bark ( <i>Lomatia hirsuta</i> ) | -        | KJ754360 |
| <i>Trebouxia</i> "sp.1" | L1148                | Chile, Tierra del Fuego, XII Region, Peninsula Brunswick, 53°50'46" S/ 71°7'4" W, 0-3 m a.s.l., 2009.                   | <i>T. atrocaesia</i>  | Perez-Ortega 1194 (GZU)   | basaltic rocks                  | KJ754303 | KJ754361 |
| clade II                | L1177                | Peru, Region de Cusco, Prov. De Anta, Distr. De Zurite, 13°26.133' S/ 72°15.196' W, 3794 m a.s.l., 2010.                | <i>Tephromela</i> sp. | Perez-Ortega 1470         | basaltic rock (granit like)     | KJ754203 | KJ754337 |
| clade II                | L1178                | Peru, Region de Cusco, Prov. De Anta, Distr. De Zurite, 13°26.133' S/ 72°15.196' W, 3794 m a.s.l., 2010.                | "                     | Perez-Ortega 1469         | basaltic rock (granit like)     | KJ754204 | KJ754338 |
| <i>Trebouxia</i> "TR1"  | L1182                | Peru, Region de Cusco, Prov. De Anta, Distr. De Zurite, 13°26.133' S/ 72°15.196' W, 3794 m a.s.l., 2010.                | "                     | Perez-Ortega 1467         | basaltic rock (granit like)     | KJ754260 | KM091800 |
| clade III               | L1199                | Peru, Region de Cusco, Prov. De Canchis, Distr. De San Pedro, 14°10'57" S/71°21'59" W, 3484 m a.s.l., 2010.             | "                     | Perez-Ortega 1455         | volcanic rock                   | KJ754205 | -        |
| clade III               | L1201                | Peru, Region de Cusco, Departamento                                                                                     | "                     | Perez-Ortega              | volcanic rock                   | KJ754206 | KJ754343 |

|                           |               |                                                                                                                         |                       |                          |                  |          |          |
|---------------------------|---------------|-------------------------------------------------------------------------------------------------------------------------|-----------------------|--------------------------|------------------|----------|----------|
|                           |               | de Puno, Sillustani, 15°42.829' S/70°8.972' W, 3792 m a.s.l., 2010.                                                     |                       | 1457                     |                  |          |          |
| -                         | L1202         | Peru, Region de Cusco, Departamento de Puno, Sillustani, 15°42.829' S/70°8.972' W, 3792 m a.s.l., 2010.                 | "                     | Perez-Ortega 1458        | volcanic rock    | -        | KJ754344 |
| clade III                 | L1203         | Peru, Region de Cusco, Departamento de Puno, Sillustani, 15°42.829' S/70°8.972' W, 3792 m a.s.l., 2010.                 | "                     | S. Perez-Ortega 1459     | volcanic rock    | KJ754207 | KJ754345 |
| clade I                   | L1204         | Peru, Region de Cusco, Prov. Urubamba, Distr. De Aguas Calientes, 13°8'59" S/ 72°32'17" W, 1 m a.s.l., 2010.            | "                     | Perez-Ortega 1453        | granitic rock    | KJ754198 | KJ754335 |
| clade I                   | L1205         | Peru, Region de Cusco, Prov. Urubamba, Distr. De Aguas Calientes, 13°8'59" S/ 72°32'17" W, 1 m a.s.l., 2010.            | "                     | Perez-Ortega 1454        | granitic rock    | KJ754199 | KJ754336 |
|                           | <b>Europe</b> |                                                                                                                         |                       |                          |                  |          |          |
| -                         | L1743         | Albania, Diber distr., Kurore e Lures mountains, Fushe-Lure village, 41°48'40" N/ 20°12'30" E, ca. 1110 m a.s.l., 2007. | <i>T. atra</i> s.lat. |                          | ophiolitic rock  | -        | KM091772 |
| <i>Trebouxia</i> "TR1"    | L1083         | Austria, Carintia, Saualpe, Wirtsofen, 46°50'52" N/ 14°40'57" E, 1730 m a.s.l., 2010.                                   | <i>T. atra</i> "Alps" | Muggia & Hafellner (TSB) | amphibolite rock | KJ754254 | KJ754365 |
| <i>T. simplex/jamesii</i> | L1084         | Austria, Carintia, Saualpe, Gertrusk                                                                                    | "                     | Muggia &                 | eclogite rock    | KJ754214 | KJ754366 |

|                           |       |                                                                                                    |   |                          |                   |           |          |
|---------------------------|-------|----------------------------------------------------------------------------------------------------|---|--------------------------|-------------------|-----------|----------|
|                           |       | Mt., 46°51'47" N/ 14°38'47" E, 1910 m a.s.l., 2010.                                                |   | Hafellner (TSB)          |                   |           |          |
| <i>T. simplex/jamesii</i> | L1086 | Austria, Carintia, Saualpe, Gertrusk Mt., 46°51'47" N/ 14°38'47" E, 1910 m a.s.l., 2010.           | " | Muggia & Hafellner (TSB) | eclogite rock     | KJ754215X | KJ754367 |
| <i>T. simplex/jamesii</i> | L1087 | Austria, Carintia, Saualpe, Gertrusk Mt., 46°51'47" N/ 14°38'47" E, 1910 m a.s.l., 2010.           | " | Muggia & Hafellner (TSB) | eclogite rock     | KJ754216  | KJ754368 |
| <i>T. simplex/jamesii</i> | L1088 | Austria, Carintia, Saualpe, Gertrusk Mt., 46°51'47" N/ 14°38'47" E, 1910 m a.s.l., 2010.           | " | Muggia & Hafellner (TSB) | eclogite rock     | KJ754217  | KJ754369 |
| <i>T. simplex/jamesii</i> | L1089 | Austria, Carintia, Saualpe, Gertrusk Mt., 46°51'47" N/ 14°38'47" E, 1910 m a.s.l., 2010.           | " | Muggia & Hafellner (TSB) | eclogite rock     | KJ754218  | KJ754370 |
| <i>T. simplex/jamesii</i> | L1390 | Austria, Styria, Steirisches Randgebirge, Handalm, 46°50'44" N/ 15°01'22" E, 1800 m a.s.l., 2011.  | " | Muggia (GZU)             | siliceous rock    | KJ754224  | KJ754373 |
| -                         | L1742 | Austria, Styria, Judenburg, Seetaler Alpe, Wildsee, 1981 m a.s.l., 47°02'30" N/ 14°35'07" E, 2007. | " | Muggia & Hafellner (TSB) | siliceous rock    | -         | KM091771 |
| -                         | L1744 | Austria, Styria, St. Oswald in Freiland, Koralpe Massiv, Swartzkogel, 1550 m a.s.l., 2008.         | " | Muggia & Hafellner (TSB) | amphibolitic rock | -         | KM091773 |
| <i>T. simplex/jamesii</i> | L1750 | Austria, Styria, Deutschlandsberg, Koralpe, NW side of Seespitz, ca.                               | " | Muggia & Hafellner       | siliceous rock    | KJ754225  | KM091779 |



|                                 |       |                                                                                                           |                       |                          |                            |          |          |
|---------------------------------|-------|-----------------------------------------------------------------------------------------------------------|-----------------------|--------------------------|----------------------------|----------|----------|
|                                 |       | 1980 m a.s.l., 2008.                                                                                      |                       | (TSB)                    |                            |          |          |
| -                               | L1751 | Austria, Carintia, Kleinalp, St. Andrä, Berensteinerhofen, 1447 m a.s.l., 46°43'19" N/ 14°58'05" E, 2007. | "                     | Muggia & Hafellner (TSB) | siliceous rock             | -        | KM091780 |
| <i>T. arboricola/decolorans</i> | L1308 | Bulgaria (not available)                                                                                  | <i>T. atra</i> s.lat. | Atanassanova (GZU)       | siliceous rock             | KJ754238 | KM091792 |
| <i>T. simplex/jamesii</i>       | L1259 | Finland, Uusimaa, Kirkkonummi: Pokkala, (WGS 84) 59.9735° N, 24.4033° E, ca. 1-2 m a.s.l., 2010.          | <i>T. atra</i> s.lat. | Högnabba F. 2080         | siliceous rock (sea shore) | KJ754211 | KJ754340 |
| <i>Trebouxia</i> "sp.1"         |       | <i>L1259 culture: L1653</i>                                                                               | "                     |                          |                            | KJ754324 | KM091754 |
| <i>Trebouxia</i> "TR1"          | L1260 | Finland, Uusimaa, Kirkkonummi: Pokkala, (WGS 84) 59.9735° N, 24.4033° E, ca. 1-2 m a.s.l., 2010.          | "                     | Högnabba 2079            | siliceous rock (sea shore) | KJ754266 | KJ754364 |
| <i>T. simplex/jamesii</i>       | L1261 | Finland, Uusimaa, Kirkkonummi: Pokkala, (WGS 84) 59.9735° N, 24.4033° E, ca. 1-2 m a.s.l., 2010.          | "                     | Högnabba 2077            | siliceous rock (sea shore) | KJ754212 | KJ754372 |
| <i>Trebouxia</i> "TR1"          | L1262 | Finland, Uusimaa, Kirkkonummi: Pokkala, (WGS 84) 59.9735° N, 24.4033° E, ca. 1-2 m a.s.l., 2010.          | "                     | Högnabba 2076            | siliceous rock (sea shore) | KJ754267 | KM091806 |
| <i>Trebouxia</i> "TR1"          | L1263 | Finland, Uusimaa, Kirkkonummi: Pokkala, (WGS 84) 59.9735° N, 24.4033° E, ca. 1-2 m a.s.l., 2010.          | "                     | Högnabba 2078            | siliceous rock (sea shore) | KJ754268 | KM091807 |
| <i>Trebouxia</i> "TR1"          |       | <i>L1263 culture: L1654</i>                                                                               | "                     |                          |                            | KJ754296 | KM091821 |
| <i>Trebouxia</i> "TR1"          | L1264 | Finland, Uusimaa, Kirkkonummi: Pokkala, (WGS 84) 59.9735° N,                                              | "                     | Veli Haikonen 26805      | siliceous rock (sea shore) | KJ754269 | KM091808 |

|                         |       |                                                                                                                    |                       |                 |                                 |          |          |
|-------------------------|-------|--------------------------------------------------------------------------------------------------------------------|-----------------------|-----------------|---------------------------------|----------|----------|
|                         |       | 24.4033° E, ca. 1-2 m a.s.l., 2010.                                                                                |                       |                 |                                 |          |          |
| 8                       |       |                                                                                                                    |                       |                 |                                 |          |          |
| <i>Trebouxia</i> "TR1"  | L1504 | France, Bretagne, Le Conquet, Kermarvan Lighthouse, 48°21'44" N/ 4°47'18" E, 2 m a.s.l.                            | <i>T. atra</i> s.lat. | Grube (GZU)     | granite                         | KJ754294 | -        |
| <i>Trebouxia</i> "sp.1" |       | <i>L1504 culture: L1667</i>                                                                                        |                       |                 |                                 | KJ754331 | KM091761 |
| -                       | L1509 | France, Bretagne, Le Conquet, Kermarvan Lighthouse, 48°21'44" N/ 4°47'18" E, 2 m a.s.l.                            | <i>T. atra</i> s.lat. | Grube (GZU)     | granite                         | -        | -        |
| <i>Trebouxia</i> "TR1"  |       | <i>L1509 culture: L1668</i>                                                                                        |                       |                 |                                 | KJ754298 | KM091822 |
| <i>Trebouxia</i> "sp.1" | L1874 | Ireland, Coubty Claire, White Strand northwest of Doonberg, c. 3 m a.s.l., 52°44'59" N/ 9°32'55" W, 2012.          | <i>T. atra</i> s.lat. | Mayrhofer 19215 | siliceous coastal cliff         | KJ754321 | -        |
| -                       | L1414 | Italy, Sicily, Palermo, Prov. Madonie Massif, Gibilmanna Sanctuary, 37.975° N/ 14.028° E, ca. 600 m a.s.l., 2011.  | <i>T. atra</i> s.lat. | Muggia (GZU)    | siliceous rock                  | -        | -        |
| clade IV                |       | <i>L1414 culture: L1661</i>                                                                                        |                       |                 |                                 | KJ754243 | KM091756 |
| <i>Trebouxia</i> "sp.1" | L1417 | Italy, Sicily, Palermo, Prov. Madonie Massif, Gibilmanna Sanctuary, 37.975° N/ 14.028° E, ca. 600 m a.s.l., 2011.  | <i>T. atra</i> s.lat. | Muggia (GZU)    | siliceous rock                  | KJ754312 | KM091753 |
| -                       | L1420 | Italy, Sicily, Palermo Prov., Madonie Massif, near Piano Battaglia, 37.873° N/ 14.013° E, ca. 1450 m a.s.l., 2011. | "                     | Muggia (GZU)    | calcareous-siliceous mixed rock | -        | -        |

|                                  |       |                                                                                                                    |                       |              |                                 |          |          |
|----------------------------------|-------|--------------------------------------------------------------------------------------------------------------------|-----------------------|--------------|---------------------------------|----------|----------|
| <i>Trebouxia</i> "sp.1"          |       | <i>L1420 culture: L1662</i>                                                                                        |                       |              |                                 | KJ754326 | -        |
| <i>Trebouxia</i> "sp.1"          | L1425 | Italy, Sicily, Palermo Prov., Madonie Massif, near Piano Battaglia, 37.873° N/ 14.013° E, ca. 1450 m a.s.l., 2011. | <i>T. atra</i> s.lat. | Muggia (GZU) | calcareous-siliceous mixed rock | KJ754313 | KM091762 |
| <i>Trebouxia</i> "sp.1"          | L1426 | Italy, Sicily, Palermo Prov., Madonie Massif, near Piano Battaglia, 37.873° N/ 14.013° E, ca. 1450 m a.s.l., 2011. | "                     | Muggia (GZU) | calcareous-siliceous mixed rock | KJ754314 | KM091763 |
| <i>T. flava/potteri/impressa</i> | L1428 | Italy, Sicily, Palermo Prov., Madonie Massif, near Piano Battaglia, 37.873° N/ 14.013° E, ca. 1450 m a.s.l., 2011. | "                     | Muggia (GZU) | calcareous-siliceous mixed rock | KJ754210 | -        |
| <i>T. incrustata</i>             |       | <i>L1428 culture: L1828</i>                                                                                        |                       |              |                                 | KJ754253 | -        |
| <i>Trebouxia</i> "sp.1"          | L1431 | Italy, Sicily, Palermo Prov., Madonie Massif, near Piano Battaglia, 37.873° N/ 14.013° E, ca. 1450 m a.s.l., 2011. | <i>T. atra</i> s.lat. | Muggia (GZU) | calcareous-siliceous mixed rock | KJ754315 | KM091764 |
| <i>Trebouxia</i> "sp.1"          | L1439 | Italy, Sicily, Palermo Prov., Madonie Massif, near Piano Battaglia, 37.873° N/ 14.013° E, ca. 1450 m a.s.l., 2011. | "                     | Muggia (GZU) | calcareous-siliceous mixed rock | KJ754316 | KM091765 |
| <i>Trebouxia</i> "sp.1"          | L1454 | Italy, Sicily, Palermo Prov., Madonie Massif, near Piano Battaglia, 37.873° N/ 14.013° E, ca. 1450 m a.s.l., 2011. | "                     | Muggia (GZU) | calcareous-siliceous mixed rock | KJ754317 | KM091766 |
| <i>Trebouxia</i> "sp.1"          | L1461 | Italy, Sicily, Trapani Prov., Rocca d'Erice, 38.043° N/ 12.586° E, ca. 680 m a.s.l., 2011.                         | <i>T. atra</i> s.lat. | Muggia (GZU) | calcareous rock                 | KJ754318 | -        |
| <i>Trebouxia</i> "sp.1"          |       | <i>L1461 culture: L1663</i>                                                                                        |                       |              |                                 | KJ754327 | KM091757 |
| <i>Trebouxia</i> "TR1"           | L1475 | Italy, Sicily, Trapani Prov., Rocca                                                                                | <i>T. atra</i> s.lat. | Muggia (GZU) | calcareous rock                 | KJ754293 | -        |

|                           |       |                                                                                                                                |                       |                      |                 |          |          |
|---------------------------|-------|--------------------------------------------------------------------------------------------------------------------------------|-----------------------|----------------------|-----------------|----------|----------|
|                           |       | d'Erice, 38.043° N/ 12.586° E, ca. 680 m a.s.l., 2011.                                                                         |                       |                      |                 |          |          |
| <i>Trebouxia</i> "sp.1"   |       | <i>L1475 culture: L1664</i>                                                                                                    |                       |                      |                 | KJ754328 | KM091758 |
| -                         | L1491 | Italy, Sicily, Trapani Prov., Egadi Islands, Marettimo Island, top of Pizzo Falcone, 37.981° N/ 12.052° E, 686 m a.s.l., 2011. | <i>T. atra</i> s.lat. | Muggia (GZU)         | calcareous rock | -        | -        |
| <i>Trebouxia</i> "sp.1"   |       | <i>L1491 culture: L1665</i>                                                                                                    |                       |                      |                 | KJ754329 | KM091759 |
| <i>Trebouxia</i> "sp.1"   | L1497 | Italy, Sicily, Trapani Prov., Egadi Islands, Marettimo Island, top of Pizzo Falcone, 37.981° N/ 12.052° E, 686 m a.s.l., 2011. | <i>T. atra</i> s.lat. | Muggia (GZU)         | calcareous rock | KJ754319 | KM091767 |
| -                         | L1501 | Italy, Sicily, Trapani Prov., Egadi Islands, Marettimo Island, top of Pizzo Falcone, 37.981° N/ 12.052° E, 686 m a.s.l., 2011. | "                     | Muggia (GZU)         | calcareous rock | -        | -        |
| <i>Trebouxia</i> "sp.1"   |       | <i>L1501 culture: L1666</i>                                                                                                    |                       |                      |                 | KJ754330 | KM091760 |
| <i>T. simplex/jamesii</i> | L1872 | Kosovo, Bjeshket e Nemuna e Kosoves, northern slopes of Maja e Ropes, 42°34'42" N/ 20°5'49" E, 2244 m a.s.l., 2012.            | <i>T. atra</i> s.lat. | Mayrhofer 19308      | siliceous rock  | KJ754226 | -        |
| <i>T. simplex/jamesii</i> | L1207 | Norway, Spitzbergen, Svalbard, Longyearbyen, Bolterdalen, 78°10'77" N/ 15°50'30" E, 103 m a.s.l., 2010.                        | <i>T. atra</i> s.lat. | S. Perez-Ortega 1442 | siliceous rock  | KJ754222 | KJ754371 |

|                                  |       |                                                                                                         |                       |                      |                |          |          |
|----------------------------------|-------|---------------------------------------------------------------------------------------------------------|-----------------------|----------------------|----------------|----------|----------|
| <i>T. flava/potteri/impressa</i> |       | <i>L1211 culture: L1652</i>                                                                             |                       |                      |                | KJ754209 | KJ754342 |
| <i>T. simplex/jamesii</i>        | L1213 | Norway, Spitzbergen, Svalbard, Longyearbyen, Bolterdalen, 78°10'77" N/ 15°50'30" E, 103 m a.s.l., 2010. | <i>T. atra</i> s.lat. | Perez-Ortega<br>1448 | siliceous rock | KJ754223 | -        |
| -                                | L1215 | Norway, Spitzbergen, Svalbard, Longyearbyen, Bolterdalen, 78°10'77" N/ 15°50'30" E, 103 m a.s.l., 2010. | <i>T. atra</i> s.lat. | Perez-Ortega<br>1445 | siliceous rock | -        | KM091791 |
| -                                | L1129 | Scotland, Skye Island, Dunvengan Peninsula, Coral Beach, 57°29'41" N/ 6°38'6" W, 5 m a.s.l., 2010.      | <i>T. atra</i> s.lat. | Perez-Ortega<br>1329 | granite        | -        | -        |
| <i>Trebouxia</i> "TR1"           |       | <i>L1129 culture: L1384</i>                                                                             |                       |                      |                | KJ754291 | KM091819 |
| <i>Trebouxia</i> "TR1"           | L1132 | Scotland, Skye Island, Dunvengan Peninsula, Coral Beach, 57°29'41" N/ 6°38'6" W, 5 m a.s.l., 2010.      | <i>T. atra</i> s.lat. | Perez-Ortega<br>1332 | granite        | KJ754259 | KM091799 |
| <i>Trebouxia</i> "TR1"           | L1326 | Scotland, East Invernesshire, Ardclach Churchyard, British Grid Coord. NH 9545 4505, 2010.              | <i>T. grumosa</i>     | Yahr 5243            | siliceous rock | KJ754270 | KM091809 |
| <i>Trebouxia</i> "TR1"           | L1327 | Scotland, Mid Perthshire, Enochdhu, Kindrogan House Grounds, British Grid Coord. NO 05460 62978, 2010.  | <i>T. atra</i> s.lat. | Yahr 5341            | brick          | KJ754271 | KM091810 |
| <i>Trebouxia</i> "TR1"           | L1328 | Scotland, Berwickshire, Northfield Farm, St Abbs Head, British Grid                                     | "                     | Yahr 5164            | coping stone   | KJ754272 | KM091811 |

|                         |       |                                                                                                       |                       |                          |                    |          |          |
|-------------------------|-------|-------------------------------------------------------------------------------------------------------|-----------------------|--------------------------|--------------------|----------|----------|
|                         |       | Coord. NT 914 674, 2010.                                                                              |                       |                          |                    |          |          |
| <i>Trebouxia</i> "TR1"  | L1329 | Scotland, Berwickshire, Northfield Farm, St Abbs Head, British Grid Coord. NT 914 674, 2010.          | "                     | Yahr 5166                | coping stone       | KJ754273 | KM091812 |
| -                       | L1395 | Scotland, Mid-Lothian, Haddington, Garleton Hills, 55°58.6'N/ 2°47.1' W, ca. 125 m a.s.l., 2010.      | <i>T. grumosa</i>     | Fryday 9429 (MSC0050468) | basalt outcrop     | -        | KM091818 |
| <i>Trebouxia</i> "TR1"  | L1396 | Scotland, Mid-Lothian, Haddington, Garleton Hills, 55°58.6'N/ 2°47.1' W, ca. 125 m a.s.l., 2010.      | <i>T. grumosa</i>     | Fryday 9433 (MSC0050469) | basalt outcrop     | KJ754292 | -        |
| <i>Trebouxia</i> "sp.1" | L1091 | Spain, Aragon, Teruel province, Albarracin, in <i>Pinus</i> forest, 30TXK370706, 1350 m a.s.l., 2010. | <i>T. atra</i> s.lat. | Perez-Ortega 1358        | sandstone boulders | KJ754255 | KM091795 |
| -                       | L1093 | Spain, Aragon, Teruel province, Albarracin, in <i>Pinus</i> forest, 30TXK370706, 1350 m a.s.l., 2010. | "                     | Perez-Ortega 1367        | sandstone boulders | -        | KJ754355 |
| <i>Trebouxia</i> "sp.1" | L1096 | Spain, Aragon, Teruel province, Albarracin, in <i>Pinus</i> forest, 30TXK370706, 1350 m a.s.l., 2010. | "                     | Perez-Ortega 1360        | sandstone boulders | KJ754299 | KJ754356 |
| <i>Trebouxia</i> "sp.1" | L1097 | Spain, Aragon, Teruel province, Albarracin, in <i>Pinus</i> forest, 30TXK370706, 1350 m a.s.l., 2010. | "                     | Perez-Ortega 1364        | sandstone boulders | KJ754300 | KM091731 |
| <i>Trebouxia</i> "sp.1" | L1098 | Spain, Aragon, Teruel province, Albarracin, in <i>Pinus</i> forest, 30TXK370706, 1350 m a.s.l., 2010. | "                     | Perez-Ortega 1366        | sandstone boulders | KJ754301 | -        |

|                                  |       |                                                                                                       |                       |                      |                                 |          |          |
|----------------------------------|-------|-------------------------------------------------------------------------------------------------------|-----------------------|----------------------|---------------------------------|----------|----------|
| <i>Trebouxia</i> "sp.1"          | L1100 | Spain, Aragon, Teruel province, Albarracin, in <i>Pinus</i> forest, 30TXK370706, 1350 m a.s.l., 2010. | "                     | Perez-Ortega<br>1355 | sandstone<br>boulders           | KJ754302 | KM091732 |
| <i>Trebouxia</i> "sp.1"          | L1101 | Spain, Aragon, Teruel province, Albarracin, in <i>Pinus</i> forest, 30TXK370706, 1350 m a.s.l., 2010. | "                     | Perez-Ortega<br>1357 | sandstone<br>boulders           | KJ754256 | KM091796 |
| <i>Trebouxia</i> "sp.1"          |       | <i>L1101 culture: L1379</i>                                                                           |                       |                      |                                 | KJ754310 | KM091738 |
| <i>T. flava/potteri/impressa</i> |       | <i>L1103 culture: L1380</i>                                                                           |                       |                      |                                 | KJ754208 | KJ754341 |
| <i>Trebouxia</i> "TR1"           | L1104 | Spain, Aragon, Teruel province, Albarracin, in <i>Pinus</i> forest, 30TXK370706, 1350 m a.s.l., 2010. | <i>T. atra</i> s.lat. | Perez-Ortega<br>1363 | sandstone<br>boulders           | KJ754257 | KM091797 |
| <i>Trebouxia</i> "TR1"           | L1105 | Spain, Aragon, Teruel province, Albarracin, in <i>Pinus</i> forest, 30TXK370706, 1350 m a.s.l., 2010. |                       | Perez-Ortega<br>1365 | sandstone<br>boulders           | KJ754258 | KM091798 |
| <i>T. arboricola/decolorans</i>  | L1107 | Spain, Aragon, Teruel province, Bronchales, 30TXK244879, 1375 m a.s.l., 2010.                         |                       | Perez-Ortega<br>1340 | bark ( <i>Quercus faginea</i> ) | KJ754236 | -        |
| <i>T. arboricola/decolorans</i>  |       | <i>L1107 culture: L1381</i>                                                                           |                       |                      |                                 | KJ754237 | KM091741 |
| -                                | L1109 | Spain, Aragon, Teruel province, Bronchales, 30TXK244879, 1375 m a.s.l., 2010.                         | <i>T. atra</i> s.lat. | Perez-Ortega<br>1338 | bark ( <i>Quercus faginea</i> ) | -        | -        |
| <i>T. arboricola/decolorans</i>  |       | <i>L1109 culture: L1382</i>                                                                           |                       |                      |                                 | KJ754239 | -        |
| -                                | L1113 | Spain, Aragon, Teruel province, Bronchales, 30TXK244879, 1375 m                                       | <i>T. atra</i> s.lat. | Perez-Ortega<br>1339 | bark ( <i>Quercus faginea</i> ) | -        | -        |

|                                 |       |                                                                                               |                       |                      |                |           |          |
|---------------------------------|-------|-----------------------------------------------------------------------------------------------|-----------------------|----------------------|----------------|-----------|----------|
|                                 |       | a.s.l., 2010.                                                                                 |                       |                      |                |           |          |
| <i>T. arboricola/decolorans</i> |       | <i>L1113 culture: L1383</i>                                                                   |                       |                      |                | KJ754240X | KM091793 |
| <i>Trebouxia</i> "sp.1"         | L1184 | Spain, Castilla y Leon, Prov. De Soria, Almarza, 41°57'54" N/ 2°28'43" W, 950 m a.s.l., 2010. | <i>T. atra</i> s.lat. | Perez-Ortega<br>1489 | siliceous rock | KJ754304  | KM091733 |
| clade V                         |       | <i>L1184 culture: L1535 (and L1650)</i>                                                       |                       |                      |                | KJ754247  | KJ754351 |
| <i>Trebouxia</i> "TR1"          | L1186 | Spain, Castilla y Leon, Prov. De Soria, Almarza, 41°57'54" N/ 2°28'43" W, 950 m a.s.l., 2010. | <i>T. atra</i> s.lat. | Perez-Ortega<br>1476 | siliceous rock | KJ754261  | KM091801 |
| <i>Trebouxia</i> "sp.1"         | L1187 | Spain, Castilla y Leon, Prov. De Soria, Almarza, 41°57'54" N/ 2°28'43" W, 950 m a.s.l., 2010. | "                     | Perez-Ortega<br>1477 | siliceous rock | KJ754305  | KM091734 |
| <i>Trebouxia</i> "sp.1"         | L1188 | Spain, Castilla y Leon, Prov. De Soria, Almarza, 41°57'54" N/ 2°28'43" W, 950 m a.s.l., 2010. | "                     | Perez-Ortega<br>1482 | siliceous rock | KJ754306  | KM091740 |
| <i>Trebouxia</i> "TR1"          | L1189 | Spain, Castilla y Leon, Prov. De Soria, Almarza, 41°57'54" N/ 2°28'43" W, 950 m a.s.l., 2010. | "                     | Perez-Ortega<br>1479 | siliceous rock | KJ754262  | KM091800 |
| <i>2Trebouxia</i> "sp.1"        | L1191 | Spain, Castilla y Leon, Prov. De Soria, Almarza, 41°57'54" N/ 2°28'43" W, 950 m a.s.l., 2010. | "                     | Perez-Ortega<br>1483 | siliceous rock | KJ754307  | KM091735 |
| <i>Trebouxia</i> "TR1"          | L1192 | Spain, Castilla y Leon, Prov. De Soria, Almarza, 41°57'54" N/ 2°28'43" W, 950 m a.s.l., 2010. | "                     | Perez-Ortega<br>1478 | siliceous rock | KJ754263  | KM091803 |
| <i>Trebouxia</i> "sp.1"         | L1193 | Spain, Castilla y Leon, Prov. De Soria,                                                       | "                     | Perez-Ortega         | siliceous rock | KJ754308  | KM091736 |



|                         |       |                                                                                                             |                       |                      |                           |                       |          |
|-------------------------|-------|-------------------------------------------------------------------------------------------------------------|-----------------------|----------------------|---------------------------|-----------------------|----------|
|                         |       | Almarza, 41°57'54" N/ 2°28'43" W,<br>950 m a.s.l., 2010.                                                    |                       | 1481                 |                           |                       |          |
| -                       | L1194 | Spain, Castilla y Leon, Prov. De Soria,<br>Almarza, 41°57'54" N/ 2°28'43" W,<br>950 m a.s.l., 2010.         | "                     | Perez-Ortega<br>1486 | siliceous rock            | -                     | -        |
| <i>Trebouxia</i> "sp.1" |       | <i>L1194 culture: L1536, L1651</i>                                                                          |                       |                      |                           | KJ754322;<br>KJ754323 | KM091739 |
| <i>Trebouxia</i> "TR1"  | L1195 | Spain, Castilla y Leon, Prov. De Soria,<br>Almarza, 41°57'54" N/ 2°28'43" W,<br>950 m a.s.l., 2010.         | <i>T. atra</i> s.lat. | Perez-Ortega<br>1480 | siliceous rock            | KJ754264              | KM091804 |
| <i>Trebouxia</i> "sp.1" | L1196 | Spain, Castilla y Leon, Prov. De Soria,<br>Almarza, 41°57'54" N/ 2°28'43" W,<br>950 m a.s.l., 2010.         | "                     | Perez-Ortega<br>1488 | siliceous rock            | KJ754309              | KM091737 |
| <i>Trebouxia</i> "TR1"  | L1197 | Spain, Castilla y Leon, Prov. De Soria,<br>Almarza, 41°57'54" N/ 2°28'43" W,<br>950 m a.s.l., 2010.         | "                     | Perez-Ortega<br>1484 | siliceous rock            | KJ754265              | KM091805 |
| <i>Trebouxia</i> "TR1"  | L1332 | Spain, Galicia, Pontevedra, Peninsula<br>del Morrazo, Cabo ome, 42°15'5" N/<br>8°52'5" W, 4 m a.s.l., 2010. | "                     | Perez-Ortega<br>1668 | siliceous rock<br>(coast) | KJ754274              | KM091813 |
| <i>Trebouxia</i> "TR1"  | L1333 | Spain, Galicia, Pontevedra, Peninsula<br>del Morrazo, Cabo ome, 42°15'5" N/<br>8°52'5" W, 4 m a.s.l., 2010. | "                     | Perez-Ortega<br>1671 | siliceous rock<br>(coast) | KJ754275              | KM091742 |
| <i>Trebouxia</i> "TR1"  | L1335 | Spain, Galicia, Pontevedra, Peninsula<br>del Morrazo, Cabo ome, 42°15'5" N/<br>8°52'5" W, 4 m a.s.l., 2010. | "                     | Perez-Ortega<br>1669 | siliceous rock<br>(coast) | KJ754276              | KM091743 |

|                         |       |                                                                                                       |           |                      |                           |          |          |
|-------------------------|-------|-------------------------------------------------------------------------------------------------------|-----------|----------------------|---------------------------|----------|----------|
| <i>Trebouxia</i> "TR1"  | L1336 | Spain, Galicia, Pontevedra, Peninsula del Morrazo, Cabo ome, 42°15'5" N/ 8°52'5" W, 4 m a.s.l., 2010. | "         | Perez-Ortega<br>1670 | siliceous rock<br>(coast) | KJ754277 | KM091814 |
| <i>Trebouxia</i> "TR1"  | L1340 | Spain, Galicia, A. Coruna, O Barreiro, Playa O Baleo, 43°38'43"N/ 8°6'6" W, 4 m a.s.l., 2010.         | "         | Perez-Ortega<br>1650 | siliceous rock<br>(coast) | KJ754278 | -        |
| <i>Trebouxia</i> "TR1"  | L1341 | Spain, Galicia, A. Coruna, O Barreiro, Playa O Baleo, 43°38'43"N/ 8°6'6" W, 4 m a.s.l., 2010.         | "         | Perez-Ortega<br>1659 | siliceous rock<br>(coast) | KJ754279 | KM091744 |
| <i>Trebouxia</i> "TR1"  | L1346 | Spain, Galicia, A. Coruna, O Barreiro, Playa O Baleo, 43°38'43"N/ 8°6'6" W, 4 m a.s.l., 2010.         | "         | Perez-Ortega<br>1643 | siliceous rock<br>(coast) | KJ754280 | KM091745 |
| <i>Trebouxia</i> "TR1"  | L1348 | Spain, Galicia, A. Coruna, O Barreiro, Playa O Baleo, 43°38'43"N/ 8°6'6" W, 4 m a.s.l., 2010.         | "         | Perez-Ortega<br>1676 | siliceous rock<br>(coast) | KJ754281 | KM091746 |
| <i>6Trebouxia</i> "TR1" | L1350 | Spain, Galicia, A. Coruna, O Barreiro, Playa O Baleo, 43°38'43"N/ 8°6'6" W, 4 m a.s.l., 2010.         | "         | Perez-Ortega<br>1658 | siliceous rock<br>(coast) | KJ754282 | KM091747 |
| <i>Trebouxia</i> "TR1"  | L1360 | Spain, Galicia, A. Coruna, O Barreiro, Playa O Baleo, 43°38'43"N/ 8°6'6" W, 4 m a.s.l., 2010.         | "         | Perez-Ortega<br>1660 | siliceous rock<br>(coast) | KJ754283 | -        |
| <i>Trebouxia</i> "TR1"  | L1363 | Spain, Galicia, A. Coruna, O Barreiro, Playa O Baleo, 43°38'43"N/ 8°6'6" W, 4 m a.s.l., 2010.         | "         | Perez-Ortega<br>1662 | siliceous rock<br>(coast) | KJ754284 | KM091748 |
| -                       | L1768 | Spain, Canary Islands, La Gomera,                                                                     | <i>T.</i> | Tafner R.            | basaltic rock             | -        | KM091784 |

|                           |       |                                                                                                           |                                                       |                    |                |          |          |
|---------------------------|-------|-----------------------------------------------------------------------------------------------------------|-------------------------------------------------------|--------------------|----------------|----------|----------|
|                           |       | “Laderas sobre Erquito”, UTM<br>277609/3111281, 1125 m a.s.l., 2012.                                      | <i>follmannii</i><br>( <i>T. atra!</i> )              | (GZU)              |                |          |          |
| -                         | L1769 | Spain, Canary Islands, La Gomera,<br>“Laderas sobre Erquito”, UTM<br>277609/3111281, 1125 m a.s.l., 2012. | "                                                     | Tafner R.<br>(GZU) | basaltic rock  | -        | KM091785 |
| -                         | L1770 | Spain, Canary Islands, La Gomera,<br>“Laderas sobre Erquito”, UTM<br>277609/3111281, 1125 m a.s.l., 2012. | "                                                     | Tafner R.<br>(GZU) | basaltic rock  | -        | KM091786 |
| -                         | L1771 | Spain, Canary Islands, La Gomera,<br>“Laderas sobre Erquito”, UTM<br>277609/3111281, 1125 m a.s.l., 2012. | "                                                     | Tafner R.<br>(GZU) | basaltic rock  | -        | KM091787 |
| <i>Trebouxia</i> "sp.1"   |       | <i>L1771 culture: L1832</i>                                                                               |                                                       |                    |                | KJ754332 | -        |
| -                         | L1772 | Spain, Canary Islands, La Gomera,<br>“Laderas sobre Erquito”, UTM<br>277609/3111281, 1125 m a.s.l., 2012. | <i>T.</i><br><i>follmannii</i><br>( <i>T. atra!</i> ) | Tafner R.<br>(GZU) | basaltic rock  | -        | KM091788 |
| -                         | L1773 | Spain, Canary Islands, La Gomera,<br>“Laderas sobre Erquito”, UTM<br>277609/3111281, 1125 m a.s.l., 2012. | "                                                     | Tafner R.<br>(GZU) | basaltic rock  | -        | KM091789 |
| <i>Trebouxia</i> "sp.1"   |       | <i>L1773 culture: L1833</i>                                                                               |                                                       |                    |                | KJ754333 | -        |
| -                         | L1774 | Spain, Canary Islands, La Gomera,<br>“Laderas sobre Erquito”, UTM<br>277609/3111281, 1125 m a.s.l., 2012. | <i>T.</i><br><i>follmannii</i><br>( <i>T. atra!</i> ) | Tafner R.<br>(GZU) | basaltic rock  | -        | KM091790 |
| <i>Trebouxia</i> "sp.1"   |       | <i>L1774 culture: L1834</i>                                                                               |                                                       |                    |                | KJ754334 | -        |
| <i>T. simplex/jamesii</i> | L1082 | Sweden, Uppland Estuna parish, Lake<br>Erken, 59°51'53" N/ 18°34'91" E, 150                               | <i>T. atra</i> s.lat.                                 | Spribile<br>(GZU)  | siliceous rock | KJ754213 | KM091794 |

|                        |                |                                                                                                                             |                                  |                      |                                     |          |          |
|------------------------|----------------|-----------------------------------------------------------------------------------------------------------------------------|----------------------------------|----------------------|-------------------------------------|----------|----------|
|                        |                | m a.s.l., 2010.                                                                                                             |                                  |                      |                                     |          |          |
| <i>Trebouxia</i> "TR1" | L1364          | Wales, Pembrokeshire, St. Brides,<br>51°45.50' N/ 5°11.30' W, 5 m a.s.l.,<br>2010.                                          | <i>T. atra</i> s.lat.            | Perez-Ortega<br>1627 | siliceous rock<br>(sea shore)       | KJ754285 | KM091815 |
| <i>Trebouxia</i> "TR1" | L1366          | Wales, Pembrokeshire, St. Brides,<br>51°45.50' N/ 5°11.30' W, 5 m a.s.l.,<br>2010.                                          | "                                | Perez-Ortega<br>1636 | siliceous rock<br>(sea shore)       | KJ754286 | KM091749 |
| <i>Trebouxia</i> "TR1" | L1368          | Wales, Pembrokeshire, St. Brides,<br>51°45.50' N/ 5°11.30' W, 5 m a.s.l.,<br>2010.                                          | "                                | Perez-Ortega<br>1633 | siliceous rock<br>(sea shore)       | KJ754287 | KM091750 |
| <i>Trebouxia</i> "TR1" | L1369          | Wales, Pembrokeshire, St. Brides,<br>51°45.50' N/ 5°11.30' W, 5 m a.s.l.,<br>2010.                                          | "                                | Perez-Ortega<br>1631 | siliceous rock<br>(sea shore)       | KJ754288 | KM091816 |
|                        |                | <i>L1369 culture: L1543</i>                                                                                                 |                                  |                      |                                     | KJ754295 | KM091820 |
| <i>Trebouxia</i> "TR1" | L1371          | Wales, Pembrokeshire, St. Brides,<br>51°45.50' N/ 5°11.30' W, 5 m a.s.l.,<br>2010.                                          | "                                | Perez-Ortega<br>1630 | siliceous rock<br>(sea shore)       | KJ754289 | KM091751 |
| <i>Trebouxia</i> "TR1" | L1378          | Wales, Pembrokeshire, St. Brides,<br>51°45.50' N/ 5°11.30' W, 5 m a.s.l.,<br>2010.                                          | "                                | Perez-Ortega<br>1642 | siliceous rock<br>(sea shore)       | KJ754290 | KM091817 |
|                        | <b>Oceania</b> |                                                                                                                             |                                  |                      |                                     |          |          |
| -                      | L1153          | Australia, Australian Capital<br>Territory, Canberra, Aranda Bushland,<br>35°16'08" S/ 149°04'51" E, 650 m<br>a.s.l., 2009. | <i>T.</i><br><i>alectoronica</i> | Elix 43472           | bark<br>( <i>Eucalyptus</i><br>sp.) | -        | KJ754362 |

|                           |       |                                                                                                                            |                       |                                     |                                        |                       |                       |
|---------------------------|-------|----------------------------------------------------------------------------------------------------------------------------|-----------------------|-------------------------------------|----------------------------------------|-----------------------|-----------------------|
| clade V                   | L1154 | Australia, Australian Capital Territory, Molonglo Gorge Forest Park, 35°19'46" S/ 149°14'59" E, 650 m a.s.l., 2009.        | <i>T. atra</i> s.lat. | Elix 43476                          | metamorphic rock                       | KJ754250              | KJ754349              |
| clade V                   |       | <i>L1154</i> culture: <i>L1386</i> , <i>L1669</i> , <i>L1670</i>                                                           |                       |                                     |                                        | KJ754249;<br>KJ754251 | KJ754350;<br>KJ754353 |
| clade V                   | L1401 | Australia, Victoria, Kooyoora State Park, 1996.                                                                            | <i>T. atra</i> s.lat. | Streimann H.<br>59158<br>MSC0143905 | siliceous rock                         | KJ754252              | KJ754354              |
| <i>Trebouxia</i> "sp.1"   | L1521 | New Zealand, Southland, c. 4 km SSE of Riverton, Howell's Point, 46°23'03" S/ 168°01'46" E, 0-5 m a.s.l., 2010.            | <i>T. atra</i> s.lat. | Wedin M.<br>9018 (S)                | seashore rock                          | KJ754320              | -                     |
| <i>Trebouxia</i> "sp.1"   |       | <i>L1521</i> culture: <i>L1655</i>                                                                                         |                       |                                     |                                        | KJ754325              | KM091755              |
| <i>T. simplex/jamesii</i> | L1889 | New Zealand, Southland, Fiorland NP, Te Anau Lake by Henry Creek campsite, -45.235° N/ 167.807° E, ca. 300 m a.s.l., 2013. | <i>T. atra</i> s.lat. | Muggia                              | bark<br>( <i>Nothofagus solandri</i> ) | KJ754227              | -                     |
| <i>T. simplex/jamesii</i> | L1893 | New Zealand, South Island, Southland, Fiorland NP, Key Summit, -44.838° N/ 168.126° E, ca. 1050 m a.s.l., 2013.            | "                     | Muggia                              | green schist rock                      | KJ754228              | -                     |
| <i>T. simplex/jamesii</i> | L1900 | New Zealand, South Island, Southland, Fiorland NP, Key Summit, -44.838° N/ 168.126° E, ca.                                 | "                     | Muggia                              | green schist rock                      | KJ754229              | -                     |

|                           |       |                                                                                                                                      |   |        |                                        |          |   |
|---------------------------|-------|--------------------------------------------------------------------------------------------------------------------------------------|---|--------|----------------------------------------|----------|---|
|                           |       | 1050 m a.s.l., 2013.                                                                                                                 |   |        |                                        |          |   |
| <i>T. simplex/jamesii</i> | L1902 | New Zealand, South Island, Southland, Fiorland NP, Key Summit, -44.838° N/ 168.126° E, ca. 1050 m a.s.l., 2013.                      | " | Muggia | green schist rock                      | KJ754230 | - |
| <i>T. simplex/jamesii</i> | L1903 | New Zealand, South Island, Lake Nelson NP, Lake Rotoiti, on top of Rainbowd Range, -41.831° N/ 172.882° E, ca. 1800 m a.s.l., 2013.  | " | Muggia | siliceous rock                         | KJ754231 | - |
| <i>T. simplex/jamesii</i> | L1906 | New Zealand, South Island, Lake Nelson NP, Lake Rotoiti, on top of Rainbowd Range, -41.831° N/ 172.882° E, ca. 1800 m a.s.l., 2013.  | " | Muggia | siliceous rock                         | KJ754232 | - |
| <i>T. simplex/jamesii</i> | L1911 | New Zealand, South Island, Lake Nelson NP, Lake Rotoiti, at Parachute Rock, -41.824° N/ 172.881° E, ca. 1400 m a.s.l., 2013.         | " | Muggia | siliceous rock                         | KJ754233 | - |
| clade "URa3"              | L1912 | New Zealand, South Island, Lake Nelson NP, Lake Rotoiti, at Parachute Rock, -41.824° N/ 172.881° E, ca. 1400 m a.s.l., 2013.         | " | Muggia | siliceous rock                         | KJ754235 | - |
| <i>T. simplex/jamesii</i> | L1929 | New Zealand, South Island, Southland, Fiorland NP, Lake Monowai, Eldrig Peak track, -45.748° N/ 167.471° E, ca. 1000 m a.s.l., 2013. | " | Muggia | bark<br>( <i>Nothofagus solandri</i> ) | KJ754234 | - |

Table S2. Sequence data retrieved from GenBank. *Trebouxia* species names are reported as in GenBank. Specimen ID, NCBI accession numbers and original lichen species are reported; the growth substrate (g.s.) of the lichen is color-coded: green = bark, orange = soil, grey = rock.

| <i>Trebouxia</i> species name | Specimen ID       | NCBI accessions (ITS) | Lichen species name             | Phylogenetic clade (as in Fig. 1)           | g.s.   |
|-------------------------------|-------------------|-----------------------|---------------------------------|---------------------------------------------|--------|
| <i>T. arboricola</i>          |                   | AF389917              | <i>Anaptychia ciliaris</i>      | <i>T. arboricola</i> / <i>T. decolorans</i> | Green  |
| <i>T. arboricola</i>          |                   | AF389916              | <i>Anaptychia ciliaris</i>      | " "                                         | Green  |
| <i>T. arboricola</i>          | AB99.082B1        | AF453259              | <i>Chaenotheca phaeocephala</i> | " "                                         | Green  |
| <i>T. arboricola</i>          | 86045E1           | AJ249482              | <i>Pleurosticta acetabulum</i>  | " "                                         | Green  |
| <i>T. arboricola</i>          | strain M-92.025C1 | AJ007387              | <i>Xanthoria parietina</i>      | " "                                         | Green  |
| <i>T. arboricola</i>          | P-319-Ig          | AJ970889              | <i>Xanthoria parietina</i>      | " "                                         | Green  |
| <i>T. asymmetrica</i>         | B207              | AF344177              | <i>Toninia sedifolia</i>        | <i>T. asymmetrica</i>                       | Orange |
| <i>T. asymmetrica</i>         | 99.024B3          | AF344176              | <i>Fulgensia fulgida</i>        | " "                                         | Orange |
| <i>T. asymmetrica</i>         | 99.023C2          | AF344175              | <i>Fulgensia fulgida</i>        | " "                                         | Orange |
| <i>T. asymmetrica</i>         | UTEX 2507         | AF345889              | <i>Diploschistes albescens</i>  | " "                                         | Orange |
| <i>T. asymmetrica</i>         | SAG 48.88         | AJ249565              | <i>Diploschistes diacapsis</i>  | " "                                         | Orange |
| <i>T. corticola</i>           | Ohmura 5410       | AB177835              | <i>Parmotrema tinctorum</i>     | " "                                         | Green  |
| <i>T. corticola</i>           | Ohmura 5404       | AB177833              | <i>Parmotrema tinctorum</i>     | <i>T. corticola</i>                         | Green  |
| <i>T. corticola</i>           | Ohmura 5372       | AB177828              | <i>Parmotrema tinctorum</i>     | " "                                         | Green  |
| <i>T. corticola</i>           | Ohmura 5361A      | AB177825              | <i>Parmotrema tinctorum</i>     | " "                                         | Green  |
| <i>T. corticola</i>           | Ohmura 5344       | AB177819              | <i>Parmotrema tinctorum</i>     | " "                                         | Green  |
| <i>T. decolorans</i>          | P-121-Ib          | AJ969549              | <i>Xanthoria parietina</i>      | <i>T. arboricola</i> / <i>T. decolorans</i> | Green  |
| <i>T. decolorans</i>          | P-319-IIc2        | AJ969597              | <i>Xanthoria parietina</i>      | " "                                         | Green  |
| <i>T. decolorans</i>          | P-319-If2         | AJ969594              | <i>Xanthoria parietina</i>      | " "                                         | Green  |
| <i>T. decolorans</i>          | P-144-IIIhd       | AJ969556              | <i>Xanthoria parietina</i>      | " "                                         | Green  |
| <i>T. decolorans</i>          | P-319-IVc2        | AJ969598              | <i>Xanthoria parietina</i>      | " "                                         | Green  |
| <i>T. decolorans</i>          | P-120a-IIIb       | AJ969545              | <i>Xanthoria parietina</i>      | " "                                         | Green  |
| <i>T. decolorans</i>          | P-164-IXa-1       | AJ969562              | <i>Xanthoria parietina</i>      | " "                                         | Green  |
| <i>T. galapagensis</i>        | strain UTEX 2230  | AJ249567              | -                               | OUTGROUP                                    | -      |
| <i>T. gelatinosa</i>          |                   | AJ249575              | <i>Flavoparmelia subrudecta</i> | <i>T. gelatinosa</i>                        | Green  |
| <i>T. gelatinosa</i>          |                   | AJ249568              | <i>Flavoparmelia caperata</i>   | " "                                         | Green  |

|                                  |                  |          |                                 |                               |   |
|----------------------------------|------------------|----------|---------------------------------|-------------------------------|---|
| <i>T. gelatinosa</i>             | UTEX 905         | Z68698   | -                               | " "                           | - |
| <i>T. gelatinosa</i>             | UBT-86.108B2     | Z68697   | -                               | " "                           | - |
| <i>T. gigantea</i>               |                  | AF242468 | <i>Letharia vulpina</i>         | <i>T. gigantea</i>            |   |
| <i>T. gigantea</i>               |                  | AJ249577 | <i>Caloplaca cerina</i>         | " "                           |   |
| <i>T. higginsiae</i>             | strain UTEX 2232 | AJ249574 | -                               | OUTGROUP                      | - |
| <i>T. impressa</i>               | Moerberg 12019   | AF389918 | <i>Physcia caesia</i>           | <i>T. impressa</i>            |   |
| <i>T. impressa</i>               | Theler 7901      | AF389931 | <i>Phaeophyscia orbicularis</i> | " "                           |   |
| <i>T. impressa</i>               | Theler 7893      | AF389930 | <i>Phaeophyscia orbicularis</i> | " "                           |   |
| <i>T. impressa</i>               |                  | AF389927 | <i>Physconia distorta</i>       | " "                           |   |
| <i>T. impressa</i>               |                  | AF389926 | <i>Physconia distorta</i>       | " "                           |   |
| <i>T. impressa</i>               | Tuerk 36121      | JN204759 | <i>Lecidea atrobrunnea</i>      | " "                           |   |
| <i>T. impressa</i>               | Tuerk 38621      | JN204761 | <i>Lecidella carpathica</i>     | " "                           |   |
| <i>T. impressa</i>               | Tuerk 43008      | JN204778 | <i>Lecidea andersonii</i>       | " "                           |   |
| <i>T. impressa</i>               | Tuerk 44632      | JN204800 | <i>Lecanora fuscobrunnea</i>    | " "                           |   |
| <i>T. incrustata</i>             |                  | AM920667 | <i>Xanthoparmelia conspersa</i> | <i>T. incrustata</i>          |   |
| <i>T. incrustata</i>             | UTEX 784         | AJ293795 | <i>Lecanora dispersa</i>        | " "                           |   |
| <i>T. incrustata</i>             |                  | FJ792801 | <i>Xanthoparmelia tinctina</i>  | " "                           |   |
| <i>T. incrustata</i>             |                  | AM920666 | <i>Lecidea fuscoatra</i>        | " "                           |   |
| <i>T. jamesii</i>                | Tuerk 42158      | JN204767 | <i>Carbonea vorticosa</i>       | <i>T. simplex/ T. jamesii</i> |   |
| <i>T. jamesii</i>                | Tuerk 42730      | JN204768 | <i>Lecidea obluridata</i>       | " "                           |   |
| <i>T. jamesii</i>                | Tuerk 43426      | JN204793 | <i>Lecidea auriculata</i>       | " "                           |   |
| <i>T. jamesii</i>                | Tuerk 44692      | JN204809 | <i>Lecidea cancriformis</i>     | " "                           |   |
| <i>T. jamesii</i>                | 458_Sv4_2        | GQ375319 | <i>Cetraria aculeata</i>        | " "                           |   |
| <i>T. jamesii</i>                | 1087_A1_3        | GQ375320 | <i>Cetraria aculeata</i>        | " "                           |   |
| <i>T. jamesii</i>                | 1436_Is1_49      | GQ375323 | <i>Cetraria aculeata</i>        | " "                           |   |
| <i>T. jamesii</i>                | 1135_Fa2_40      | GQ375355 | <i>Cetraria aculeata</i>        | " "                           |   |
| <i>T. jamesii</i>                | 1159_Sp1_15      | GQ375338 | <i>Cetraria aculeata</i>        | " "                           |   |
| <i>T. jamesii</i>                | 1384_Ch1_32      | GQ375363 | <i>Cetraria aculeata</i>        | " "                           |   |
| <i>T. jamesii</i> "letharii" (1) |                  | AF242460 | <i>Letharia vulpina</i>         | <i>T. jamesii</i> "letharii"  |   |
| <i>T. jamesii</i> "letharii" (4) |                  | AF242463 | <i>Letharia vulpina</i>         | " "                           |   |
| <i>T. jamesii</i> "letharii" (5) |                  | AF242464 | <i>Letharia vulpina</i>         | " "                           |   |
| <i>T. showmanii</i>              |                  | AF242470 | <i>Letharia vulpina</i>         | <i>T. showmanii</i>           |   |



|                         |                 |          |                             |                                     |   |
|-------------------------|-----------------|----------|-----------------------------|-------------------------------------|---|
| <i>T. showmanii</i>     | SAG 2009        | FJ626734 | -                           | " "                                 | - |
| <i>T. simplex</i>       |                 | DQ166600 | <i>Lecanora rupicola</i>    | <i>T. simplex/ T. jamesii</i>       |   |
| <i>T. simplex</i>       |                 | DQ166620 | <i>Lecanora swartzii</i>    | " "                                 |   |
| <i>T. simplex</i>       |                 | EU551513 | <i>Tephromela atra</i>      | " "                                 |   |
| <i>T. simplex</i>       |                 | EU551512 | <i>Tephromela atra</i>      | " "                                 |   |
| <i>T. simplex</i>       |                 | EU551541 | <i>Tephromela atra</i>      | " "                                 |   |
| <i>T. simplex</i>       |                 | EU551542 | <i>Tephromela atra</i>      | " "                                 |   |
| <i>T. simplex</i>       |                 | EU551543 | <i>Tephromela atra</i>      | " "                                 |   |
| <i>T. suecica</i>       | strain SAG 2207 | FJ626736 | -                           | " "                                 | - |
| <i>T. usneae</i>        |                 | AJ249573 | <i>Usnea filipendula</i>    | OUTGROUP                            | - |
| <i>T. usneae</i>        | UBT-87.019A1    | Z68702   | -                           | OUTGROUP                            | - |
| <hr/>                   |                 |          |                             |                                     |   |
| <i>Trebouxia "URa1"</i> | Tuerk 35604     | JN204749 | <i>Lecidea cancriformis</i> | <i>Trebouxia "URa1"</i>             |   |
| <i>Trebouxia "URa1"</i> | Tuerk 42992     | JN204771 | <i>Lecidea cancriformis</i> | " "                                 |   |
| <i>Trebouxia "URa1"</i> | Tuerk 44712     | JN204811 | <i>Lecidea cancriformis</i> | " "                                 |   |
| <i>Trebouxia "URa1"</i> | Tuerk 44727     | JN204812 | <i>Lecidea cancriformis</i> | " "                                 |   |
| <i>Trebouxia "URa2"</i> | Tuerk 33620     | JN204735 | <i>Lecidea greenii</i>      | <i>Trebouxia "URa2"</i> (Antarctic) |   |
| <i>Trebouxia "URa2"</i> | Tuerk 35770     | JN204756 | <i>Lecanora physciella</i>  | " "                                 |   |
| <i>Trebouxia "URa2"</i> | Tuerk 42995     | JN204772 | <i>Lecidea andersonii</i>   | " "                                 |   |
| <i>Trebouxia "URa2"</i> | Tuerk 43004     | JN204776 | <i>Lecidea spilei</i>       | " "                                 |   |
| <i>Trebouxia "URa2"</i> | Tuerk 43006     | JN204777 | <i>Lecidea andersonii</i>   | " "                                 |   |
| <i>Trebouxia "URa2"</i> | Tuerk 43011     | JN204779 | <i>Lecidea andersonii</i>   | " "                                 |   |
| <i>Trebouxia "URa2"</i> | Tuerk 43015     | JN204782 | <i>Lecidea greenii</i>      | " "                                 |   |
| <i>Trebouxia "URa2"</i> | Tuerk 43032     | JN204790 | <i>Rhizoplaca macleanii</i> | " "                                 |   |
| <i>Trebouxia "URa3"</i> | Tuerk 40136     | JN204765 | <i>Lecidea fuscoatra</i>    | <i>Trebouxia "URa3"</i>             |   |
| <i>Trebouxia "URa3"</i> | Tuerk 35502     | JN204747 | <i>Carbonea vorticosa</i>   | " "                                 |   |
| <i>Trebouxia "URa3"</i> | ADT 18027       | JN204826 | <i>Lecidea andersonii</i>   | " "                                 |   |
| <i>Trebouxia "URa3"</i> | RS19162         | JN204841 | <i>Lecidea cancriformis</i> | " "                                 |   |
| <i>Trebouxia</i> sp.    |                 | DQ166595 | <i>Lecanora rupicola</i>    | " "                                 |   |
| <i>Trebouxia</i> sp.    |                 | DQ166611 | <i>Lecanora rupicola</i>    | " "                                 |   |
| <i>Trebouxia</i> sp.    | PS2008          | FM945345 | <i>Cetraria islandica</i>   | <i>T. simplex/ T. jamesii</i>       |   |

|                        |      |          |                             |   |                        |  |
|------------------------|------|----------|-----------------------------|---|------------------------|--|
| <i>Trebouxia</i> sp.   |      | JX474334 | <i>Lasallia pustulata</i>   | " | "                      |  |
| <i>Trebouxia</i> sp.   |      | JX474349 | <i>Lasallia pustulata</i>   | " | "                      |  |
| <i>Trebouxia</i> sp.   |      | JX474357 | <i>Lasallia pustulata</i>   | " | "                      |  |
| <i>Trebouxia</i> sp.   |      | JX036166 | <i>Lecidea cancriformis</i> | " | "                      |  |
| <i>Trebouxia</i> sp.   |      | JX036180 | <i>Austrolecia</i> sp.      | " | "                      |  |
| <i>Trebouxia</i> sp.   |      | JX036194 | <i>Austrolecia</i> sp.      | " | "                      |  |
| <i>Trebouxia</i> sp.   |      | JX036210 | <i>Austrolecia</i> sp.      | " | "                      |  |
| <i>Trebouxia</i> sp.   |      | JX036208 | <i>Austrolecia</i> sp.      | " | "                      |  |
| <i>Trebouxia</i> sp.   |      | JX036273 | <i>Austrolecia</i> sp.      | " | "                      |  |
| <i>Trebouxia</i> sp.   |      | JX036217 | <i>Lecanora</i> sp.         | " | "                      |  |
| <i>Trebouxia</i> sp.   |      | JX036168 | <i>Lecidea greenii</i>      | " | "                      |  |
| <i>Trebouxia</i> sp.   |      | JX036240 | <i>Rhizoplaca</i> sp.       | " | "                      |  |
| <i>Trebouxia</i> sp.   |      | JX036211 | <i>Sarcogyne privigna</i>   | " | "                      |  |
| <i>Trebouxia</i> sp.   |      | JX036160 | lichen sp.                  | " | "                      |  |
| <i>Trebouxia</i> sp.   |      | JX036213 | <i>Buellia frigida</i>      | " | "                      |  |
| <i>Trebouxia</i> sp.   |      | JX036272 | <i>Buellia frigida</i>      | " | "                      |  |
| <i>Trebouxia</i> sp.   |      | JX036231 | <i>Rhizoplaca macleanii</i> | " | "                      |  |
| <i>Trebouxia</i> sp.   |      | JX036259 | <i>Rhizoplaca macleanii</i> | " | "                      |  |
| <i>Trebouxia</i> "TR1" |      | GU252178 | <i>Ramalina farinacea</i>   |   | <i>Trebouxia "TR1"</i> |  |
| <i>Trebouxia</i> "TR1" |      | GU252173 | <i>Ramalina farinacea</i>   | " | "                      |  |
| <i>Trebouxia</i> "TR1" |      | GU252195 | <i>Ramalina farinacea</i>   | " | "                      |  |
| <i>Trebouxia</i> "TR1" |      | GU252202 | <i>Ramalina farinacea</i>   | " | "                      |  |
| <i>Trebouxia</i> sp.   | TRS1 | FJ792799 | <i>Ramalina siliquosa</i>   | " | "                      |  |
| <i>Trebouxia</i> sp.   |      | DQ166608 | <i>Lecanora rupicola</i>    | " | "                      |  |
| <i>Trebouxia</i> sp.   |      | EU551525 | <i>Lecanora cenisia</i>     | " | "                      |  |
| <i>Trebouxia</i> sp.   |      | EU551527 | <i>Tephromela atra</i>      | " | "                      |  |
| <i>Trebouxia</i> sp.   |      | EU551546 | <i>Tephromela atra</i>      | " | "                      |  |
| <i>Trebouxia</i> sp.   |      | EU551547 | <i>Tephromela atra</i>      | " | "                      |  |
| <i>Trebouxia</i> sp.   |      | EU551536 | <i>Tephromela grumosa</i>   | " | "                      |  |
| <i>Trebouxia</i> "TR9" |      | GU252182 | <i>Ramalina farinacea</i>   |   | <i>Trebouxia "TR9"</i> |  |
| <i>Trebouxia</i> "TR9" |      | GU252197 | <i>Ramalina farinacea</i>   | " | "                      |  |
| <i>Trebouxia</i> "TR9" |      | GU252200 | <i>Ramalina farinacea</i>   | " | "                      |  |

|                             |                 |          |                                     |                                     |  |
|-----------------------------|-----------------|----------|-------------------------------------|-------------------------------------|--|
| <i>Trebouxia</i> sp.        |                 | EU551508 | <i>Tephromela atra</i>              | <i>Trebouxia "sp.1"</i>             |  |
| <i>Trebouxia</i> sp.        |                 | EU551523 | <i>Tephromela atra</i>              | " "                                 |  |
| <i>Trebouxia</i> sp.        |                 | AF534386 | <i>Rimularia insularis</i>          | " "                                 |  |
| <i>Trebouxia</i> sp.        |                 | DQ166610 | <i>Lecanora rupicola</i>            | " "                                 |  |
| <i>Trebouxia</i> sp.        |                 | DQ166587 | <i>Lecanora rupicola</i>            | " "                                 |  |
| <i>Trebouxia</i> sp.        |                 | DQ166584 | <i>Lecanora lojkaeana</i>           | " "                                 |  |
| <i>Trebouxia</i> sp.        |                 | AM159216 | <i>Xanthoria karrooensis</i>        | " "                                 |  |
| <i>Trebouxia</i> sp.        | A4cIII          | HQ026180 | <i>Boreoplaca ultrafrigida</i>      | <b>clade IV</b>                     |  |
| <i>Trebouxia</i> sp.        | A4cI            | HQ026178 | <i>Boreoplaca ultrafrigida</i>      | " "                                 |  |
| <i>Trebouxia</i> sp.        | AdIII           | HQ026182 | <i>Boreoplaca ultrafrigida</i>      | " "                                 |  |
| <i>Trebouxia</i> sp.        | A3cI            | HQ026167 | <i>Boreoplaca ultrafrigida</i>      | " "                                 |  |
| <i>Trebouxia</i> sp.        | A3dII           | HQ026171 | <i>Boreoplaca ultrafrigida</i>      | " "                                 |  |
| <i>Trebouxia</i> sp.        |                 | DQ166603 | <i>Lecanora rupicola*</i>           | <b>clade V</b>                      |  |
| <i>Trebouxia</i> sp.        |                 | DQ133476 | <i>Protoparmeliopsis muralis</i>    | <i>Trebouxia "muralis I"</i>        |  |
| <i>Trebouxia</i> sp.        |                 | DQ133500 | <i>Protoparmeliopsis muralis</i>    | " "                                 |  |
| <i>Trebouxia</i> sp.        |                 | DQ133481 | <i>Protoparmeliopsis muralis</i>    | " "                                 |  |
| <i>Trebouxia</i> sp. "URa6" | Tuerk 38608     | JN204760 | <i>Lecidella stigmatea</i>          | " "                                 |  |
| <i>Trebouxia</i> sp.        | Trinkaus 439    | AJ293782 | <i>Buellia elegans</i>              | " "                                 |  |
| <i>Trebouxia</i> sp.        |                 | FJ792797 | <i>Seirophora villosa</i>           | <i>T. arboricola/ T. decolorans</i> |  |
| <i>Trebouxia</i> sp.        | P400            | AM159210 | <i>Xanthomendoza hasseana</i>       | <i>T. arboricola/ T. decolorans</i> |  |
| <i>Trebouxia</i> sp.        | Trinkaus 450    | AJ293784 | <i>Buellia zoharyi</i>              | <i>T. asymmetrica</i>               |  |
| <i>Trebouxia</i> "URa4"     | Tuerk 39665     | JN204764 | <i>Lecidella stigmatea</i>          | <i>T. asymmetrica</i>               |  |
| <i>Trebouxia</i> sp.        | P350aIII        | AM159213 | <i>Xanthomendoza</i> sp.            | <i>T. gelatinosa</i>                |  |
| <i>Trebouxia</i> sp.        | Dornes 11-1996  | AJ293787 | <i>Physcia semipinnata</i>          | " "                                 |  |
| <i>Trebouxia</i> sp.        | TTC1            | FJ792802 | <i>Teloschistes chrysophthalmus</i> | " "                                 |  |
| <i>Trebouxia</i> sp.        | Mayrhofer 13747 | AJ293790 | <i>Rinodinella controversa</i>      | <i>T. gigantea</i>                  |  |
| <i>Trebouxia</i> sp.        | Kauff 4-1998    | AJ293773 | <i>Physcia adscendens</i>           | <i>T. impressa</i>                  |  |
| <i>Trebouxia</i> sp.        | Helms 4-1999    | AJ293771 | <i>Physcia adscendens</i>           | " "                                 |  |
| <i>Trebouxia</i> sp.        | Mayrhofer 13723 | AJ293793 | <i>Rinodina capensis</i>            | " "                                 |  |
| <i>Trebouxia</i> sp.        | Pa2             | AJ293775 | <i>Physcia aipolia</i>              | " "                                 |  |
| <i>Trebouxia</i> sp.        | B10             | AJ431579 | <i>Umbilicaria antarctica</i>       | <i>T. incrustata</i>                |  |
| <i>Trebouxia</i> sp.        | B7              | AJ431577 | <i>Umbilicaria antarctica</i>       | " "                                 |  |

|                      |                       |          |                                                  |                      |          |
|----------------------|-----------------------|----------|--------------------------------------------------|----------------------|----------|
| <i>Trebouxia</i> sp. | B8                    | AJ431591 | <i>Umbilicaria antarctica</i>                    | "                    | "        |
| <i>Trebouxia</i> sp. | B9                    | AJ431578 | <i>Umbilicaria antarctica</i>                    | "                    | "        |
| <i>Trebouxia</i> sp. | Mayrhofer 13740       | AJ293791 | <i>Rinodina atrocineria</i>                      | "                    | "        |
| <i>Trebouxia</i> sp. | Mayrhofer 13749       | AJ293789 | <i>Rinodina tunicata</i>                         | "                    | "        |
| <i>Trebouxia</i> sp. | Trinkaus 356a         | AJ293783 | <i>Buellia georgei</i>                           | "                    | "        |
| <i>Trebouxia</i> sp. | 003 BRY-C55153        | KF026223 | <i>Xanthoparmelia</i> aff. <i>cumberlandia</i>   | "                    | " (BMP2) |
| <i>Trebouxia</i> sp. | 013 BRY-C55163        | KF026233 | <i>Xanthoparmelia</i> aff. <i>norchlorochroa</i> | <i>Trebouxia</i>     | "BMP1"   |
| <i>Trebouxia</i> sp. | 024 BRY-C55173        | KF026242 | <i>Xanthoparmelia</i> aff. <i>cumberlandia</i>   | <i>Trebouxia</i>     | "BMP1"   |
| <i>Trebouxia</i> sp. | 034 BRY-C55182        | KF026251 | <i>Xanthoparmelia</i> aff. <i>coloradoënsis</i>  | <i>Trebouxia</i>     | "BMP1"   |
| <i>Trebouxia</i> sp. | 062 BRY-C55207        | KF026276 | <i>Xanthoparmelia</i> aff. <i>cumberlandia</i>   | <i>T. incrustata</i> | (BMP2)   |
| <i>Trebouxia</i> sp. | 005 BRY-C55155        | KF026225 | <i>Xanthoparmelia</i> aff. <i>chlorochroa</i>    | "                    | " (BMP3) |
| <i>Trebouxia</i> sp. | 006 BRY-C55156        | KF026226 | <i>Xanthoparmelia</i> aff. <i>coloradoënsis</i>  | "                    | " (BMP5) |
| <i>Trebouxia</i> sp. | 011 BRY-C55161        | KF026231 | <i>Xanthoparmelia</i> aff. <i>chlorochroa</i>    | "                    | " (BMP5) |
| <i>Trebouxia</i> sp. | 016 BRY-C55166        | KF026236 | <i>Xanthoparmelia</i> aff. <i>chlorochroa</i>    | "                    | " (BMP4) |
| <i>Trebouxia</i> sp. | 017 BRY-C55167        | KF026237 | <i>Xanthoparmelia</i> aff. <i>coloradoënsis</i>  | "                    | " (BMP5) |
| <i>Trebouxia</i> sp. | 018 BRY-C55168        | KF026238 | <i>Xanthoparmelia</i> aff. <i>coloradoënsis</i>  | "                    | " (BMP4) |
| <i>Trebouxia</i> sp. | 023 BRY-C55172        | KF026241 | <i>Xanthoparmelia</i> aff. <i>coloradoënsis</i>  | "                    | " (BMP5) |
| <i>Trebouxia</i> sp. | 028 BRY-C55176        | KF026245 | <i>Xanthoparmelia</i> aff. <i>chlorochroa</i>    | "                    | " (BMP5) |
| <i>Trebouxia</i> sp. | 031 BRY-C55179        | KF026248 | <i>Xanthoparmelia</i> aff. <i>chlorochroa</i>    | "                    | " (BMP3) |
| <i>Trebouxia</i> sp. | 032 BRY-C55180        | KF026249 | <i>Xanthoparmelia</i> aff. <i>chlorochroa</i>    | "                    | " (BMP4) |
| <i>Trebouxia</i> sp. | 035 BRY-C55183        | KF026252 | <i>Xanthoparmelia</i> aff. <i>coloradoënsis</i>  | "                    | " (BMP5) |
| <i>Trebouxia</i> sp. | 038 BRY-C55186        | KF026255 | <i>Xanthoparmelia</i> aff. <i>cumberlandia</i>   | "                    | " (BMP5) |
| <i>Trebouxia</i> sp. | 060 BRY-C Leavitt 060 | KF026274 | <i>Xanthoparmelia</i> aff. <i>cumberlandia</i>   | "                    | " (BMP5) |
| <i>Trebouxia</i> sp. | 064 BRY-C55209        | KF026278 | <i>Xanthoparmelia</i> aff. <i>coloradoënsis</i>  | "                    | " (BMP4) |
| <i>Trebouxia</i> sp. |                       | EU717912 | <i>Physcia tenella</i>                           | -                    |          |
| <i>Trebouxia</i> sp. |                       | EU717913 | <i>Physcia tenella</i>                           | -                    |          |

**Table S3.** Information about axenically isolated *Trebouxia* photobionts: DNA extraction number of original lichen thallus, country of origin, substrate, DNA extraction number of the axenically isolated photobiont, notes on growth type and affiliation to phylogenetic clades in Fig. 1 are reported. Incongruences found between the photobionts directly amplified from the lichen thallus and those isolated in culture are labelled with numbers (1-8) and asterisks.

| incongruences | DNA id. N°<br>original thallus | Thallus sp.<br>(according<br><i>Trebouxia</i><br>phylogeny) | Origin    |                  | DNA id. N°<br>algal culture | Cultured sp. (according<br><i>Trebouxia</i> phylogeny) |     | Type of growth       |                                               |
|---------------|--------------------------------|-------------------------------------------------------------|-----------|------------------|-----------------------------|--------------------------------------------------------|-----|----------------------|-----------------------------------------------|
|               |                                |                                                             | Country   | Substrate        |                             |                                                        |     | colour               | morphology                                    |
| *1            | L1101                          | <i>Trebouxia "TRI"</i>                                      | Spain     | sandstone        | L1379                       | <i>Trebouxia "sp.1"</i>                                | TEM | dark green           | fast growth, rather slimy, 3d growths         |
|               | L1103                          | -                                                           | Spain     | sandstone        | L1380                       | <i>T. impressa/flava/potteri</i>                       |     | light green          | middle growth, rather slimy, 3D growth darker |
|               | L1107                          | <i>T. arboricola</i>                                        | Spain     | bark             | L1381                       | <i>T. arboricola</i>                                   |     | dark green           | fast-middle growth, brittle,                  |
|               | L1109                          | -                                                           | Spain     | bark             | L1382                       | <i>T. arboricola</i>                                   |     | dark green           | fast growth, rather slimy                     |
|               | L1113                          | -                                                           | Spain     | bark             | L1383                       | <i>T. arboricola</i>                                   |     | dark green           | fast growth, rather slimy, 3d growths         |
|               | L1129                          | -                                                           | Scotland  |                  | L1384                       | <i>Trebouxia "TRI"</i>                                 | TEM | light green          | fast growth, rather slimy                     |
|               | L1154                          | <i>clade V</i>                                              | Australia | metamorphic rock | L1386, L1669                | <i>clade V</i>                                         |     | dark and light green | fast-middle growth, brittle, 3D growth darker |
| *2            | L1184                          | <i>Trebouxia "sp.1"</i>                                     | Spain     | siliceous rock   | L1535, L1650                | <i>clade V</i>                                         | TEM | light green          | fast growth, rather slimy                     |
|               | L1194                          | -                                                           | Spain     | siliceous rock   | L1536, L1651                | <i>Trebouxia "sp.1"</i>                                |     | light green          | fast growth, rather slimy, 3d growths         |
|               | L1211                          | -                                                           | Norway    | siliceous rock   | L1652                       | <i>T. impressa</i>                                     |     | dark green           | fast growth, brittle, 3D growth darker        |
| *3            | L1259                          | <i>T. simplex/jamesii</i>                                   | Finland   | siliceous rock   | L1653                       | <i>Trebouxia "sp.1"</i>                                |     | light green          | fast growth, rather slimy                     |

|           |       |                         |            |                           |              |                         |     |             |                                               |
|-----------|-------|-------------------------|------------|---------------------------|--------------|-------------------------|-----|-------------|-----------------------------------------------|
|           | L1263 | <i>Trebouxia "TRI"</i>  | Finland    | siliceous rock            | L1654        | <i>Trebouxia "TRI"</i>  | TEM | light green | fast-middle growth, brittle, 3D growth        |
|           | L1360 | <i>Trebouxia "TRI"</i>  | Spain      | siliceous rock            | L1542        | -                       |     | dark green  | fast growth, brittle, 3D growth               |
|           | L1369 | <i>Trebouxia "TRI"</i>  | Wales      | siliceous rock            | L1543, L1659 | <i>Trebouxia "TRI"</i>  | TEM | light green | fast growth, rather slimy                     |
| <b>*4</b> | L1389 | <i>clade IV</i>         | Alaska     | basaltic rock             | L1541, L1656 | <i>clade V</i>          |     | light green | fast-middle growth, rather slimy              |
| <b>*5</b> | L1408 | <i>clade IV</i>         | Alaska     | siliceous rock            | L1660        | <i>Trebouxia "TRI"</i>  |     | dark green  | fast growth, brittle, 3D growth               |
|           | L1414 | -                       | Italy      | siliceous rock            | L1661        | <i>clade IV</i>         |     | light green | fast growth, brittle, 3D growth               |
|           | L1420 | -                       | Italy      | calcareous rock           | L1662        | <i>Trebouxia "sp.1"</i> |     | light green | fast-middle growth, brittle, 3D growth        |
| <b>*6</b> | L1428 | <i>T. impressa</i>      | Italy      | calcareous rock           | L1828        | <i>T. incrustata</i>    |     | dark green  | fast-middle growth, brittle, 3D growth        |
|           | L1461 | <i>Trebouxia "sp.1"</i> | Italy      | calcareous rock           | L1663        | <i>Trebouxia "sp.1"</i> |     | light green | fast-middle growth, brittle, 3D growth        |
| <b>*7</b> | L1475 | <i>Trebouxia "TRI"</i>  | Italy      | calcareous rock           | L1664        | <i>Trebouxia "sp.1"</i> |     | light green | fast growth, brittle, 3D growth               |
|           | L1491 | -                       | Italy      | calcareous rock           | L1665        | <i>Trebouxia "sp.1"</i> |     | dark green  | fast-middle growth, brittle, 3D growth darker |
|           | L1501 | -                       | Italy      | calcareous rock           | L1666        | <i>Trebouxia "sp.1"</i> |     | light green | fast-middle growth, brittle, 3D growth darker |
| <b>*8</b> | L1504 | <i>Trebouxia "TRI"</i>  | France     | granite (seashore)        | L1667        | <i>Trebouxia "sp.1"</i> |     | dark green  | fast growth, rather slimy                     |
|           | L1509 | -                       | France     | granite (seashore)        | L1668        | <i>Trebouxia "TRI"</i>  |     | light green | fast growth, rather slimy                     |
|           | L1521 | <i>Trebouxia "sp.1"</i> | New Zeland | siliceous rock (seashore) | L1655        | <i>Trebouxia "sp.1"</i> |     | dark green  | fast growth, rather slimy                     |

|       |   |                                |                |       |                         |             |                                        |
|-------|---|--------------------------------|----------------|-------|-------------------------|-------------|----------------------------------------|
| L1767 | - | Africa                         | bark           | L1831 | <i>clade I</i>          | light green | fast growth, rather slimy              |
| L1771 | - | Spain ( <i>T. follmannii</i> ) | siliceous rock | L1832 | <i>Trebouxia "sp.1"</i> | light green | fast growth, rather slimy              |
| L1773 | - | Spain ( <i>T. follmannii</i> ) | siliceous rock | L1833 | <i>Trebouxia "sp.1"</i> | light green | fast-middle growth, brittle, 3D growth |
| L1774 | - | Spain ( <i>T. follmannii</i> ) | siliceous rock | L1834 | <i>Trebouxia "sp.1"</i> | light green | fast growth, rather slimy              |

---
